# Supplementary material for: Syntheses and ligand exchange experiments of N,N-dialkylcarbamate bridged {Al3(μ3-O)}7+ complexes
Source: Royal Society of Chemistry journal article supplement (doi:10.1039/d3nj02389c), 2023-01-01
Supplement: d3nj02389c1.pdf [file d3nj02389c1.pdf]

## New Journal of Chemistry

### **Syntheses and ligand exchange experiments of *N,N*-dialkylcarbamate bridged $\{\text{Al}_3(\mu_3\text{-O})\}^{7+}$ complexes**

Erik Schumann, Uwe Böhme, Erica Brendler and Florian Mertens

## **Electronic Supplementary Information**

DOI: <https://doi.org/00.0000/0000000000>

## Synthetic procedures

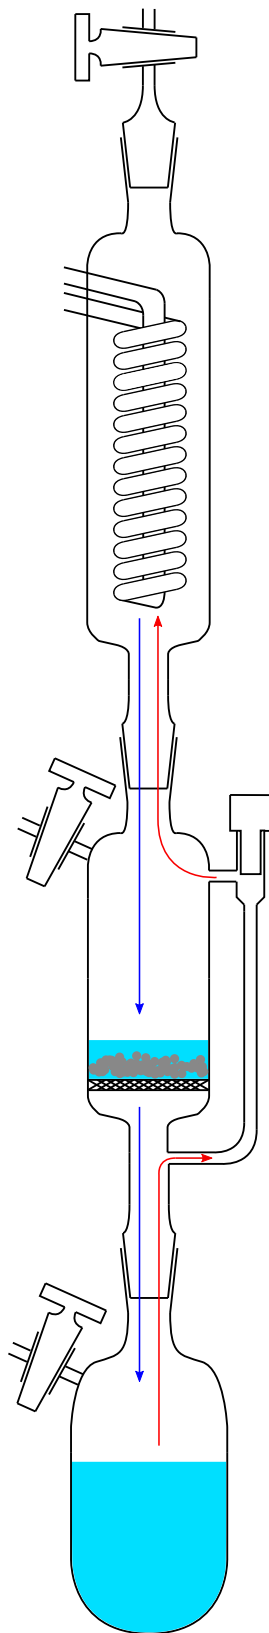

Figure ESI.1: Illustration of the extraction procedure with diethyl ether (blue coloured liquid) with a SCHLENK-type extractor.

## Crystal structures of compounds (1a) and (2a)

| distance | value, Å   |
|----------|------------|
| Al1–O5   | 1.8110(7)  |
| Al1–O3   | 1.8885(19) |
| Al1–O1   | 1.906(2)   |
| Al1–O2#1 | 1.9138(19) |
| Al1–O4#2 | 1.9146(19) |
| Al1–N1   | 2.107(2)   |
| O1–C1    | 1.275(3)   |
| O2–C1    | 1.275(3)   |
| O3–C2    | 1.278(3)   |
| O4–C2    | 1.279(3)   |
| N2–C1    | 1.348(3)   |
| N2–C8    | 1.460(4)   |
| N2–C12   | 1.464(4)   |
| N3–C2    | 1.348(3)   |
| N3–C13   | 1.459(4)   |
| N3–C17   | 1.464(4)   |
| N1–C3A   | 1.471(7)   |
| N1–C3B   | 1.497(18)  |
| N1–C7B   | 1.350(11)  |
| N1–C7A   | 1.463(4)   |

| angle          | value, °   |
|----------------|------------|
| O5–Al1–O3      | 94.14(10)  |
| O5–Al1–O1      | 93.74(10)  |
| O5–Al1–O2#1    | 96.92(8)   |
| O5–Al1–O4#2    | 96.10(8)   |
| O3–Al1–N1      | 89.43(10)  |
| O1–Al1–N1      | 82.68(10)  |
| O2#1–Al1–N1    | 80.82(9)   |
| O4#2–Al1–N1    | 86.21(9)   |
| Al1#1–O5–Al1#2 | 119.995(3) |
| O2–C1–O1       | 123.9(2)   |
| O3–C2–O4       | 123.8(2)   |

Symmetry transformations used to generate equivalent atoms:  
 #1  $-y+1, x-y, z$   
 #2  $-x+y+1, -x+1, z$

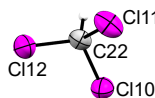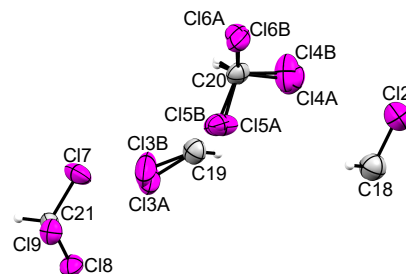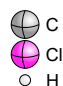

Figure ESI.2: Left: selected distances; middle: selected angles; right: chloroform molecules in the asymmetric unit of the crystal structure of compound (2a); C18-Cl2 and C19-Cl3A/B are chloroform molecules on special positions of symmetry, thermal ellipsoids with 50% probability.

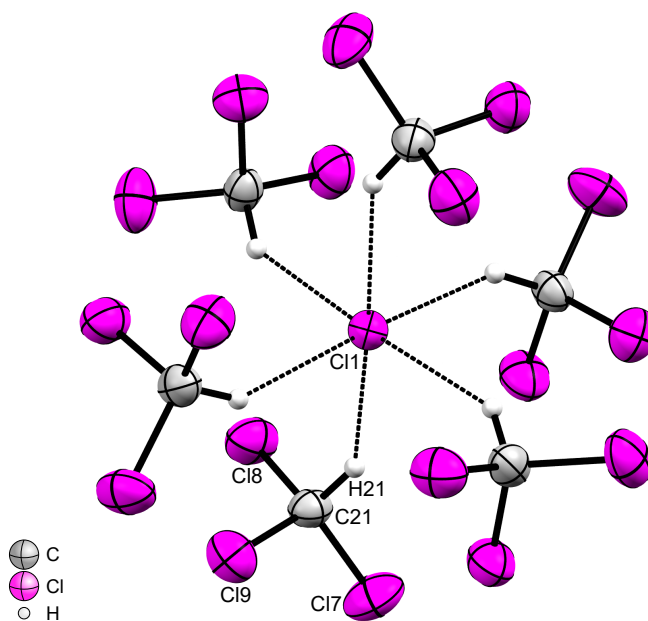

Figure ESI.3: Detailed illustration of the octahedral arrangement of the chloroform molecules around the chloride ion of compound (2a) through hydrogen bonds, thermal ellipsoids with 50% probability.

| distance | value, Å   | angle       | value, °  |
|----------|------------|-------------|-----------|
| Al1–O13  | 1.8186(15) | O13–Al1–O3  | 96.66(8)  |
| Al2–O13  | 1.8458(16) | O13–Al1–O10 | 98.66(7)  |
| Al3–O13  | 1.8416(16) | O13–Al1–O1  | 97.46(7)  |
| Al1–O3   | 1.8867(19) | O13–Al1–O12 | 97.49(7)  |
| Al1–O10  | 1.8994(18) | O13–Al2–O2  | 96.79(8)  |
| Al1–O1   | 1.9007(18) | O13–Al2–O5  | 94.90(8)  |
| Al1–O12  | 1.9079(18) | O13–Al2–O7  | 97.20(7)  |
| Al1–N1   | 2.158(2)   | O13–Al2–O4  | 94.02(7)  |
| Al2–O2   | 1.8753(19) | O13–Al3–O6  | 93.84(8)  |
| Al2–O5   | 1.8900(18) | O13–Al3–O11 | 95.08(7)  |
| Al2–O7   | 1.8961(18) | O13–Al3–O9  | 97.31(8)  |
| Al2–O4   | 1.9002(17) | O13–Al3–O8  | 96.31(7)  |
| Al2–N2   | 2.1197(19) | O3–Al1–N1   | 83.85(9)  |
| Al3–O6   | 1.8651(19) | O10–Al1–N1  | 80.97(9)  |
| Al3–O11  | 1.8944(17) | O1–Al1–N1   | 79.75(9)  |
| Al3–O9   | 1.9007(19) | O12–Al1–N1  | 85.29(9)  |
| Al3–O8   | 1.9068(17) | O2–Al2–N2   | 83.64(8)  |
| Al3–N3   | 2.113(2)   | O5–Al2–N2   | 85.69(8)  |
| O1–C1    | 1.266(3)   | O7–Al2–N2   | 82.39(8)  |
| O2–C1    | 1.260(3)   | O4–Al2–N2   | 85.39(7)  |
| O3–C2    | 1.263(3)   | O6–Al3–N3   | 84.82(8)  |
| O4–C2    | 1.260(3)   | O11–Al3–N3  | 86.42(8)  |
| O5–C3    | 1.248(3)   | O9–Al3–N3   | 84.83(8)  |
| O6–C3    | 1.258(3)   | O8–Al3–N3   | 81.57(8)  |
| O7–C4    | 1.253(3)   | Al1–O13–Al3 | 119.78(8) |
| O8–C4    | 1.258(3)   | Al1–O13–Al2 | 120.02(8) |
| O9–C5    | 1.255(3)   | Al3–O13–Al2 | 120.17(8) |
| O10–C5   | 1.271(3)   | O2–C1–O1    | 124.3(2)  |
| O11–C6   | 1.265(3)   | O4–C2–O3    | 125.2(2)  |
| O12–C6   | 1.261(3)   | O5–C3–O6    | 124.5(2)  |
| N1–C7B   | 1.362(16)  | O7–C4–O8    | 125.2(2)  |
| N1–C7A   | 1.413(9)   | O9–C5–O10   | 124.4(2)  |
| N1–C10   | 1.452(4)   | O12–C6–O11  | 125.8(2)  |
| N2–C11   | 1.492(3)   |             |           |
| N2–C14   | 1.493(3)   |             |           |
| N2–H2    | 0.88(3)    |             |           |
| N3–C15   | 1.496(3)   |             |           |
| N3–C18   | 1.500(3)   |             |           |
| N3–H3    | 0.85(3)    |             |           |
| N4–C1    | 1.340(3)   |             |           |
| N4–C19   | 1.455(3)   |             |           |
| N4–C22   | 1.461(3)   |             |           |
| N5–C2    | 1.347(3)   |             |           |
| N5–C23   | 1.460(3)   |             |           |
| N5–C26   | 1.460(4)   |             |           |
| N6–C3    | 1.345(3)   |             |           |
| N6–C27   | 1.449(3)   |             |           |
| N6–C30   | 1.463(3)   |             |           |
| N7–C4    | 1.356(3)   |             |           |
| N7–C31   | 1.456(3)   |             |           |
| N7–C34   | 1.459(3)   |             |           |
| N8–C5    | 1.339(3)   |             |           |
| N8–C35   | 1.466(3)   |             |           |
| N8–C38   | 1.459(3)   |             |           |
| N9–C6    | 1.350(3)   |             |           |
| N9–C39   | 1.462(4)   |             |           |
| N9–C42   | 1.460(3)   |             |           |

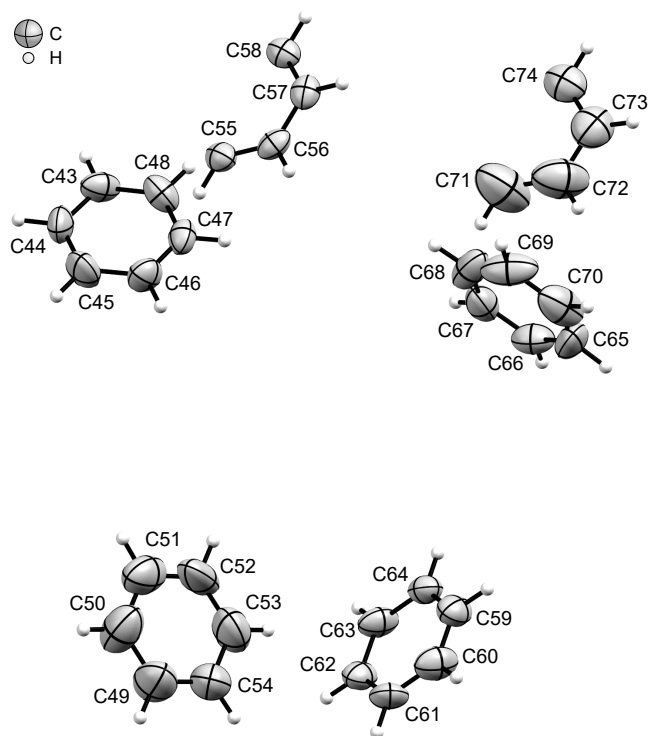

Figure ESI.4: Left: selected distances; middle: selected angles; right: benzene molecules in the asymmetric unit of the crystal structure of compound (**1a**), thermal ellipsoids with 50% probability.

## NMR investigations and ligand exchange

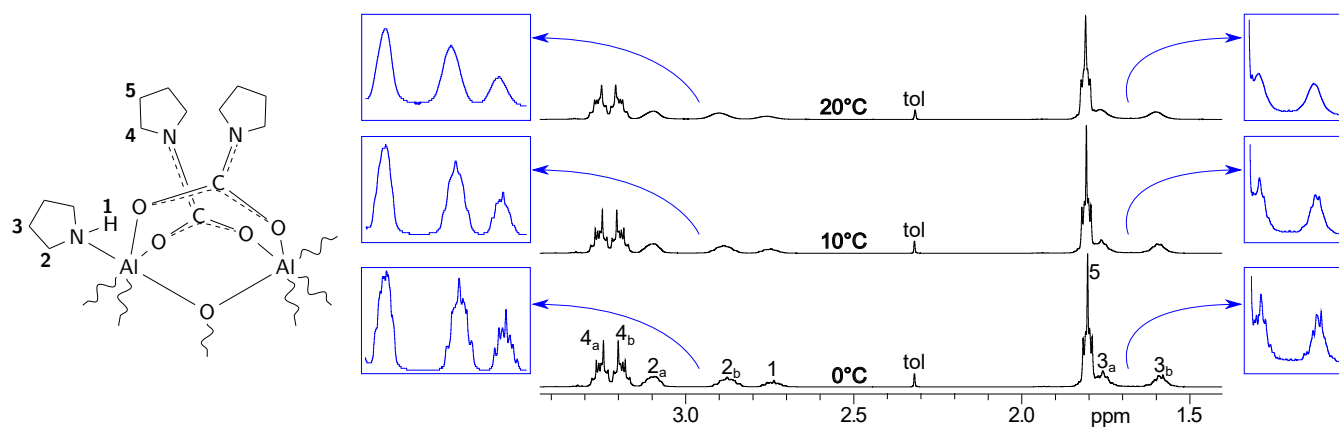

Figure ESI.5: Temperature-dependent  $^1\text{H}$  NMR ( $\text{CDCl}_3$ ) spectra of compound (1a).

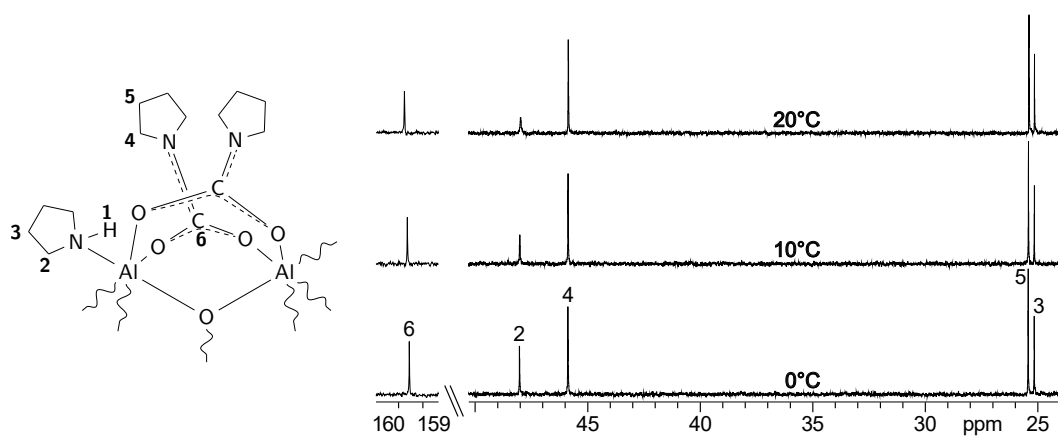

Figure ESI.6: Temperature-dependent  $^{13}\text{C}$  NMR ( $\text{CDCl}_3$ ) spectra of compound (1a).

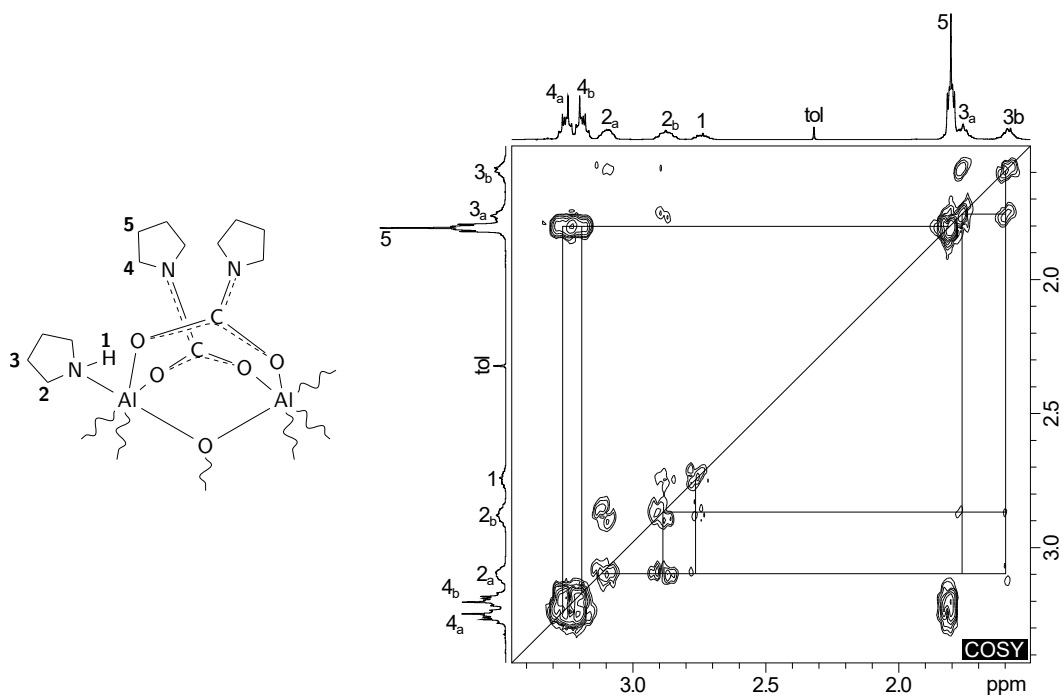

Figure ESI.7: H,H COSY spectrum (CDCl<sub>3</sub>) of compound (1a) at 0°C.

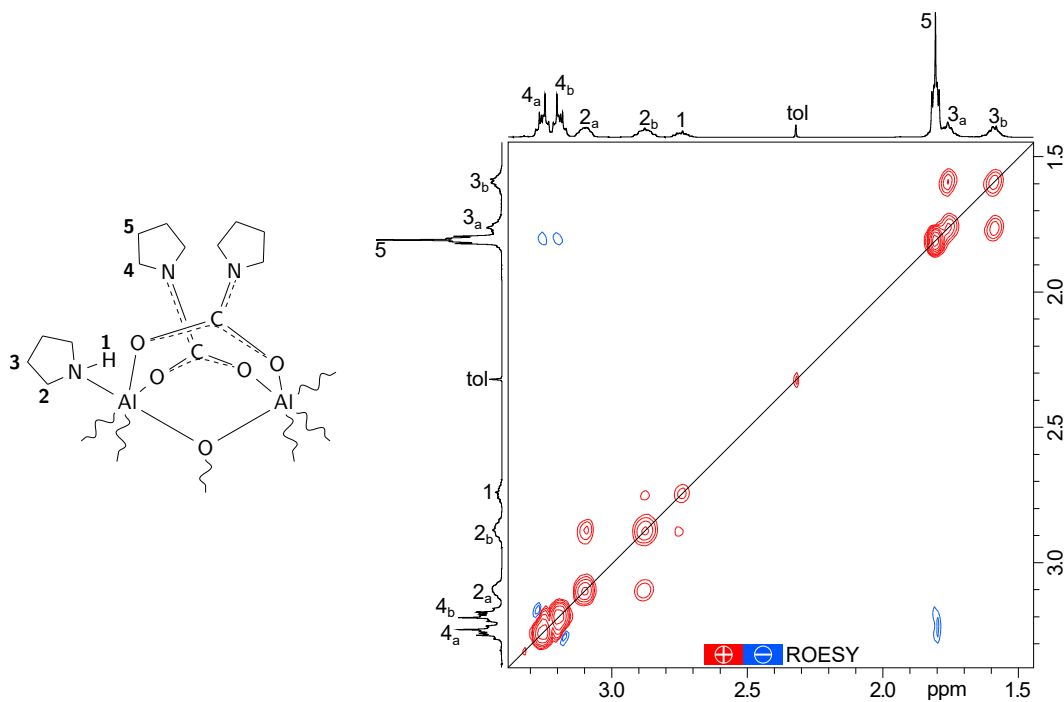

Figure ESI.8: H,H ROESY spectrum (CDCl<sub>3</sub>) of compound (1a); red coloured positive intensity; blue coloured negative intensity at 0°C.

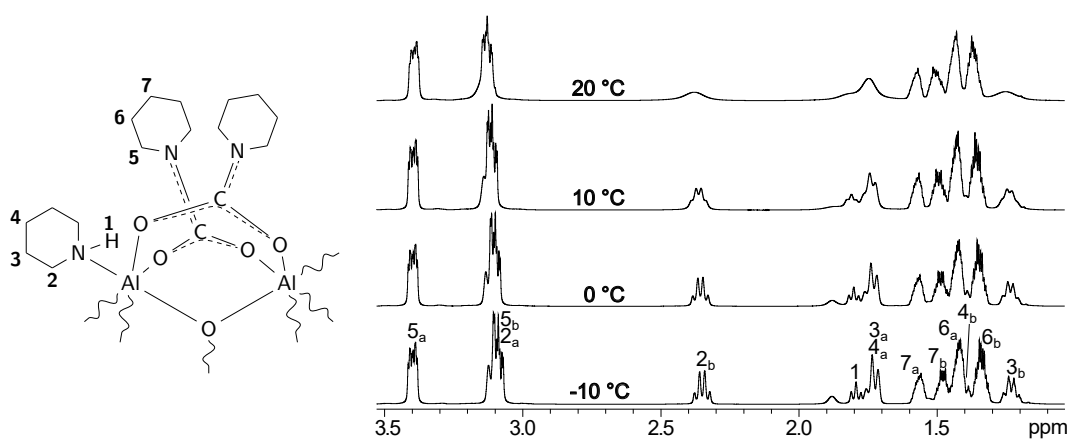

Figure ESI.9: Temperature-dependent  $^1\text{H}$  NMR ( $\text{CDCl}_3$ ) spectra of compound (2a).

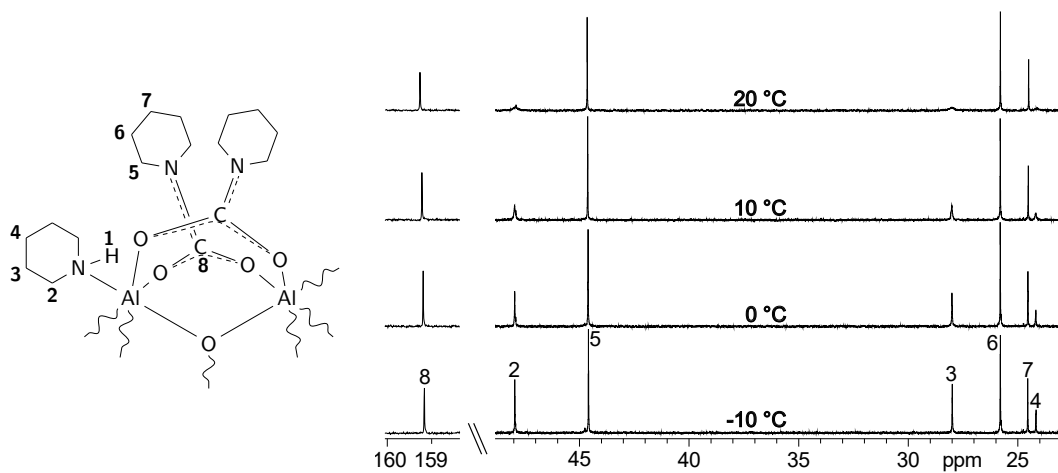

Figure ESI.10: Temperature-dependent  $^{13}\text{C}$  NMR ( $\text{CDCl}_3$ ) spectra of compound (2a).

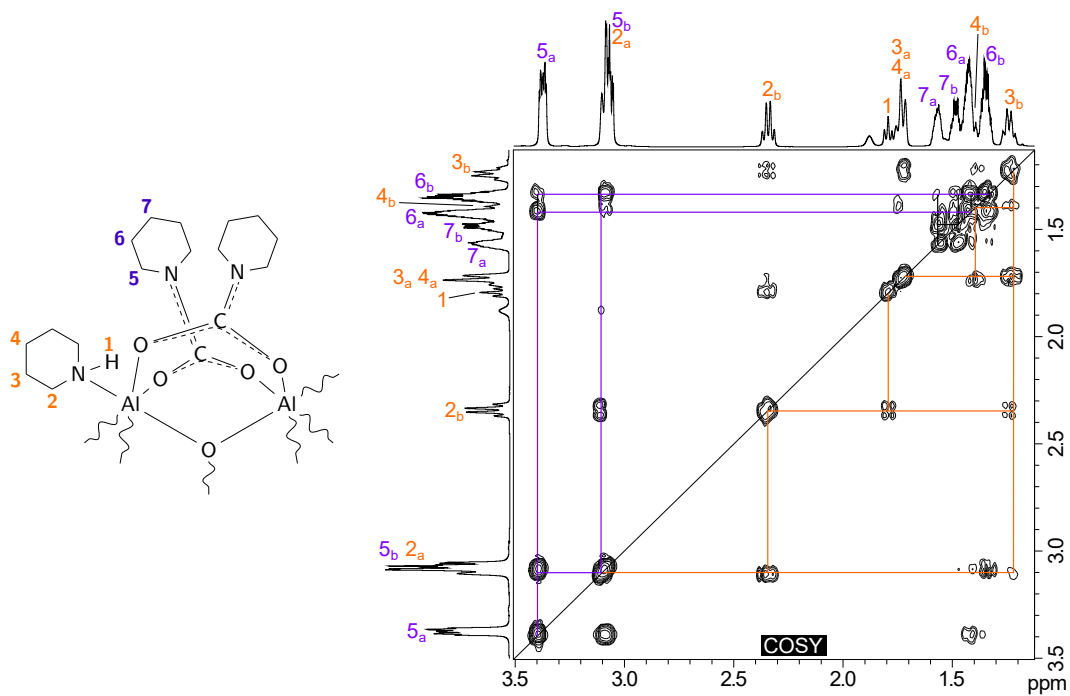

Figure ESI.11: H,H COSY spectrum ( $\text{CDCl}_3$ ) of compound (2a) at  $0^\circ\text{C}$ .

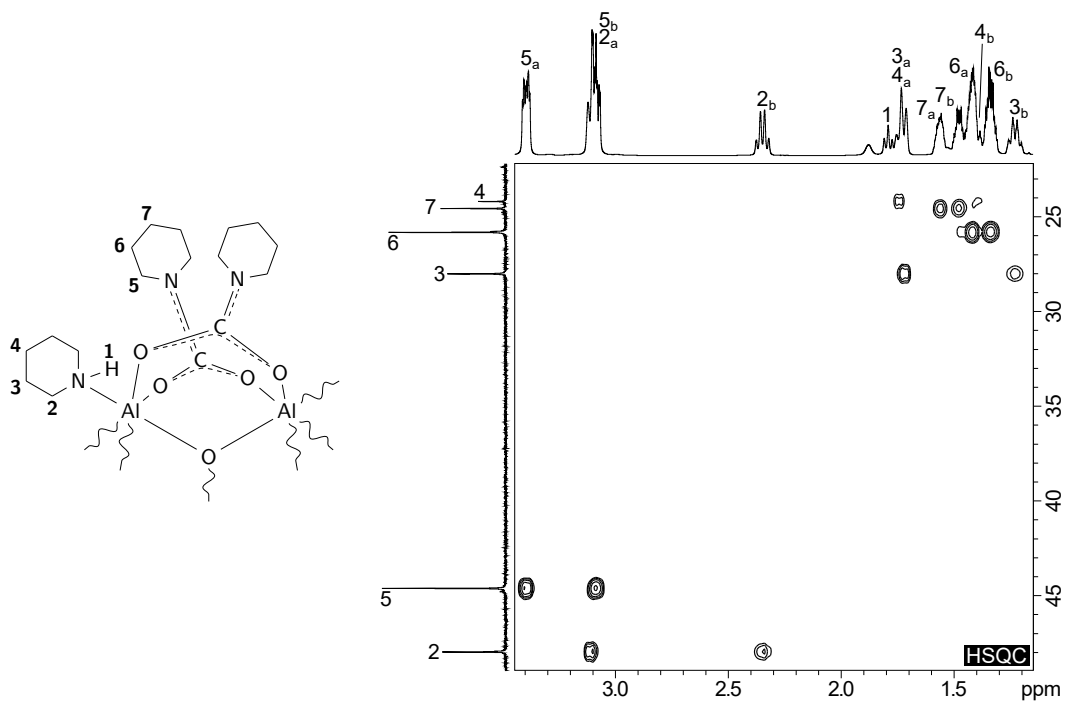

Figure ESI.12: HSQC spectrum ( $\text{CDCl}_3$ ) of compound (2a) at  $0^\circ\text{C}$ .



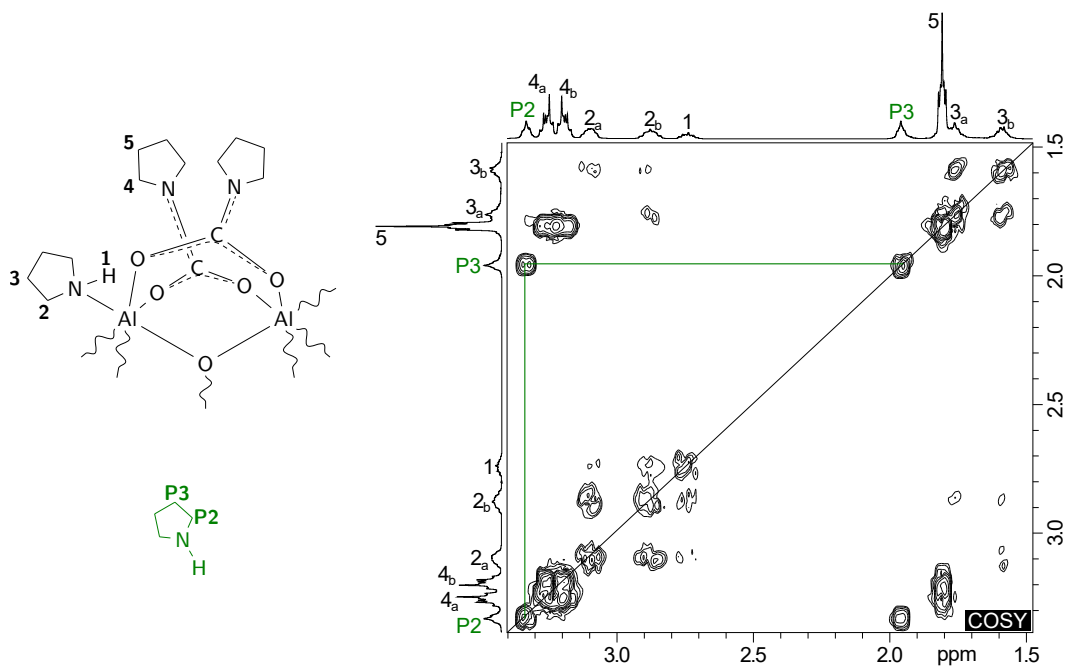

Figure ESI.13:  $^1\text{H}$ , $^1\text{H}$  COSY spectrum ( $\text{CDCl}_3$ ) of a compound (**1a**) sample that contains residual pyrrolidine (green marked labels P2 and P3); spectrum was measured at  $0^\circ\text{C}$ .

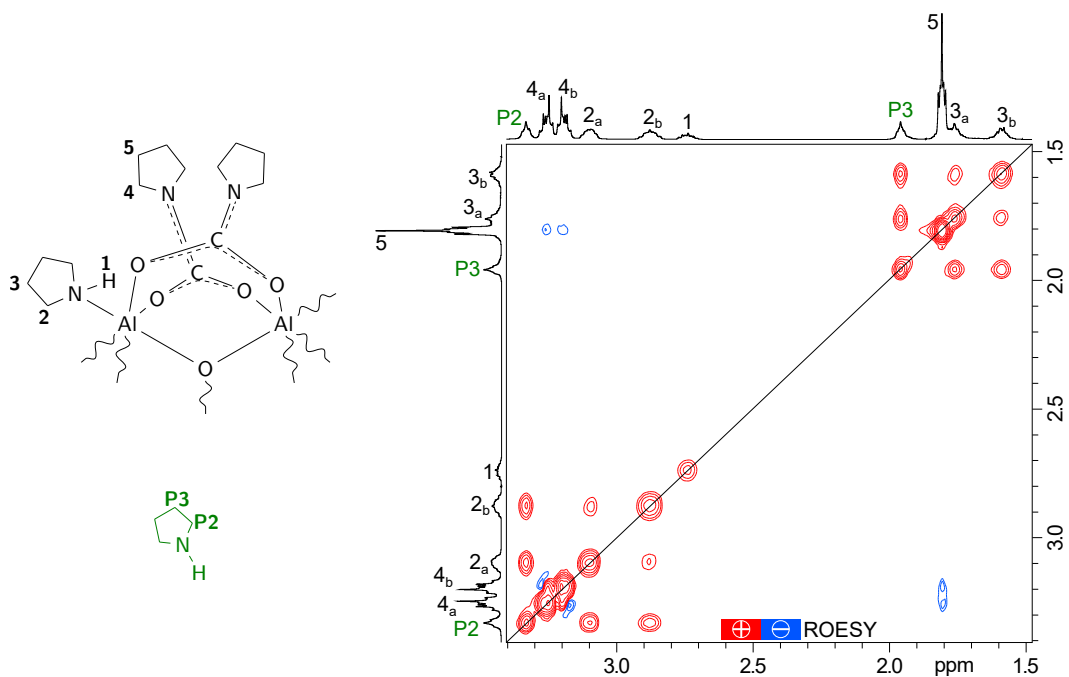

Figure ESI.14:  $^1\text{H}$ , $^1\text{H}$  ROESY spectrum ( $\text{CDCl}_3$ ) of a compound (**1a**) sample that that contains residual pyrrolidine (green marked labels P2 and P3); red coloured positive intensity; blue coloured negative intensity; spectrum was measured at  $0^\circ\text{C}$ .

## Analyses of compounds (1b) and (2b)

| distance | value, Å   |
|----------|------------|
| Al1–O13  | 1.8135(12) |
| Al2–O13  | 1.8165(12) |
| Al3–O13  | 1.8220(11) |
| Al1–O1   | 1.8831(12) |
| Al1–O12  | 1.8835(13) |
| Al1–O3   | 1.8940(13) |
| Al1–O10  | 1.8954(13) |
| Al2–O7   | 1.8798(13) |
| Al2–O5   | 1.8895(13) |
| Al2–O2   | 1.8960(13) |
| Al2–O4   | 1.8965(13) |
| Al3–O8   | 1.8802(13) |
| Al3–O11  | 1.8851(13) |
| Al3–O9   | 1.8919(13) |
| Al3–O6   | 1.8932(13) |
| Al1–N1   | 2.1175(14) |
| Al2–N2   | 2.1301(14) |
| Al3–N3   | 2.1275(14) |
| O1–C1    | 1.265(2)   |
| O2–C1    | 1.2692(19) |
| O3–C2    | 1.270(2)   |
| O4–C2    | 1.267(2)   |
| O5–C3    | 1.272(2)   |
| O6–C3    | 1.272(2)   |
| O7–C4    | 1.2726(19) |
| O8–C4    | 1.2645(19) |
| O9–C5    | 1.268(2)   |
| O10–C5   | 1.273(2)   |
| O11–C6   | 1.271(2)   |
| O12–C6   | 1.266(2)   |
| N1–C11   | 1.341(2)   |
| N1–C7    | 1.344(2)   |
| N2–C16   | 1.340(2)   |
| N2–C12   | 1.346(2)   |
| N3–C21   | 1.340(2)   |
| N3–C17   | 1.346(2)   |
| N4–C1    | 1.340(2)   |
| N4–C25   | 1.461(2)   |
| N4–C22   | 1.462(2)   |
| N5–C2    | 1.338(2)   |
| N5–C26   | 1.463(2)   |
| N5–C29   | 1.463(3)   |
| N6–C3    | 1.338(2)   |
| N6–C30   | 1.461(2)   |
| N6–C33   | 1.463(2)   |
| N7–C4    | 1.336(2)   |
| N7–C34   | 1.461(2)   |
| N7–C37   | 1.464(2)   |
| N8–C5    | 1.339(2)   |
| N8–C41   | 1.460(2)   |
| N8–C38   | 1.460(2)   |
| N9–C6    | 1.338(2)   |
| N9–C42   | 1.461(2)   |
| N9–C45   | 1.462(2)   |

| angle       | value, °   |
|-------------|------------|
| O13–Al1–O1  | 97.69(5)   |
| O13–Al1–O12 | 97.43(5)   |
| O13–Al1–O3  | 96.69(5)   |
| O13–Al1–O10 | 95.75(5)   |
| O13–Al2–O7  | 97.37(5)   |
| O13–Al2–O5  | 97.55(5)   |
| O13–Al2–O2  | 96.35(5)   |
| O13–Al2–O4  | 96.39(5)   |
| O13–Al3–O8  | 96.69(5)   |
| O13–Al3–O11 | 97.13(5)   |
| O13–Al3–O6  | 95.10(5)   |
| O13–Al3–O9  | 97.67(5)   |
| O1–Al1–N1   | 81.85(5)   |
| O12–Al1–N1  | 83.05(5)   |
| O3–Al1–N1   | 83.72(6)   |
| O10–Al1–N1  | 83.85(6)   |
| O7–Al2–N2   | 83.41(6)   |
| O5–Al2–N2   | 84.24(5)   |
| O2–Al2–N2   | 82.88(5)   |
| O4–Al2–N2   | 81.81(5)   |
| O8–Al3–N3   | 81.14(5)   |
| O11–Al3–N3  | 83.95(5)   |
| O9–Al3–N3   | 84.51(5)   |
| O6–Al3–N3   | 83.89(5)   |
| Al1–O13–Al2 | 119.95(6)  |
| Al1–O13–Al3 | 119.93(6)  |
| Al2–O13–Al3 | 120.11(6)  |
| O1–C1–O2    | 124.90(14) |
| O4–C2–O3    | 124.77(15) |
| O5–C3–O6    | 125.01(15) |
| O8–C4–O7    | 124.76(15) |
| O9–C5–O10   | 125.13(15) |
| O12–C6–O11  | 125.16(15) |

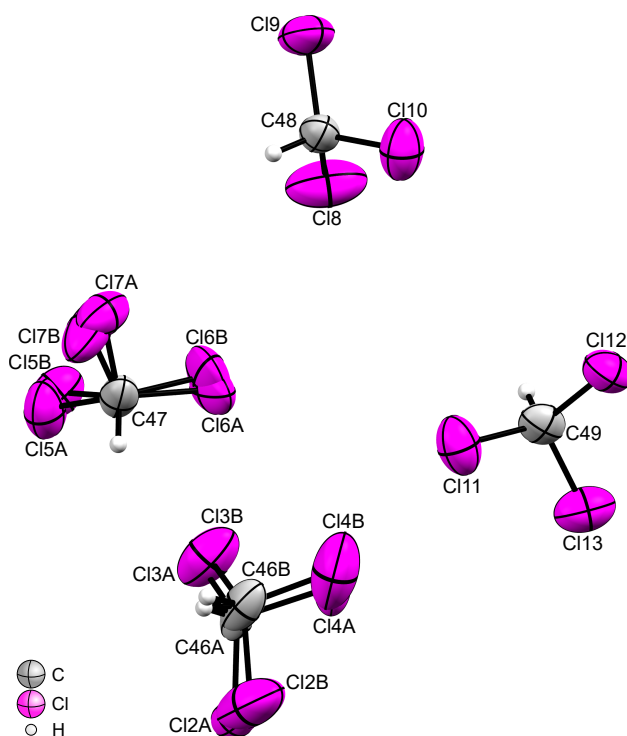

Figure ESI.15: Left: selected distances; middle: selected angles; right: chloroform molecules of the asymmetric unit of the crystal structure of compound (1b), thermal ellipsoids with 50% probability.

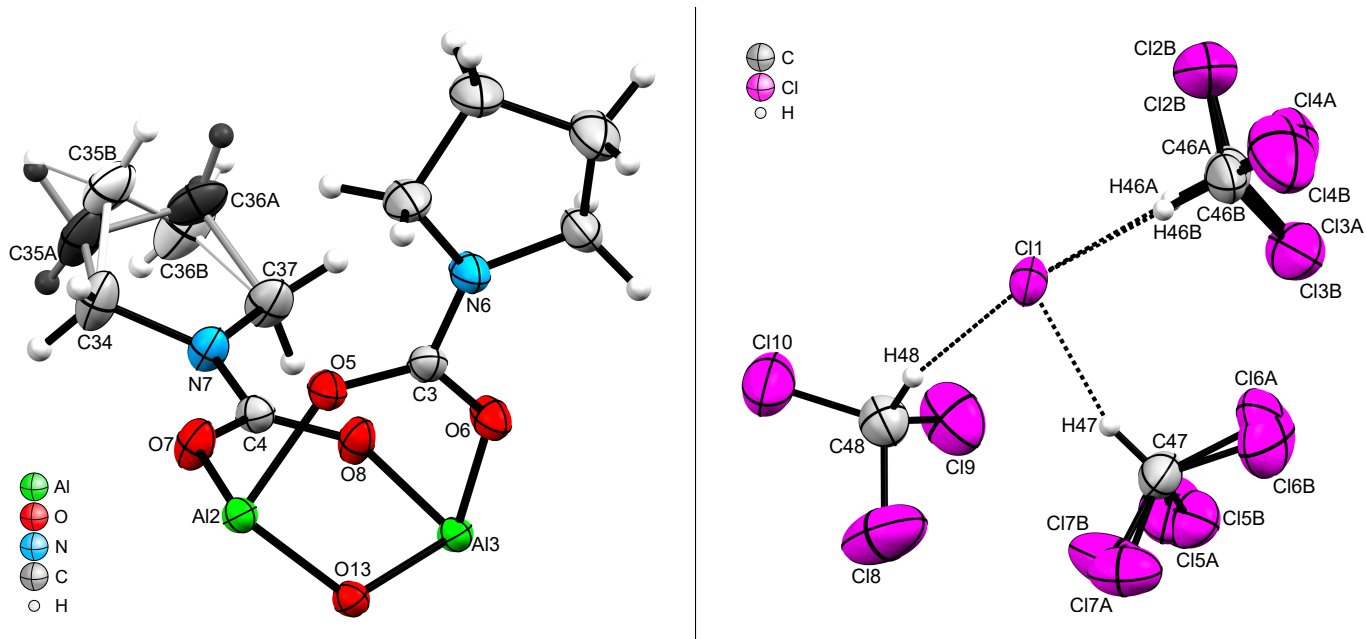

Figure ESI.16: Left: Detailed illustration of the disordered carbon atoms C35 and C36 of a carbamate bridge of compound (**1b**), thermal ellipsoids with 50% probability; right: arrangement of the chloroform molecules around the chloride ion of compound (**1b**) through hydrogen bonds, thermal ellipsoids with 50% probability.

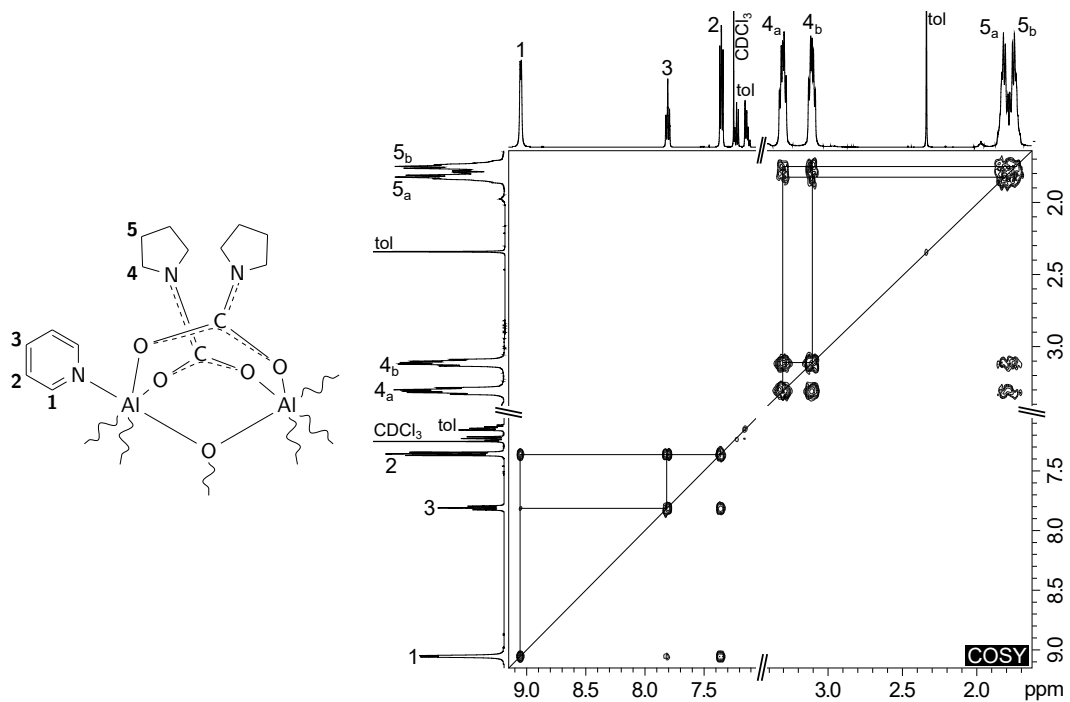

Figure ESI.17: H,H COSY spectrum (CDCl<sub>3</sub>) of compound (**1b**).

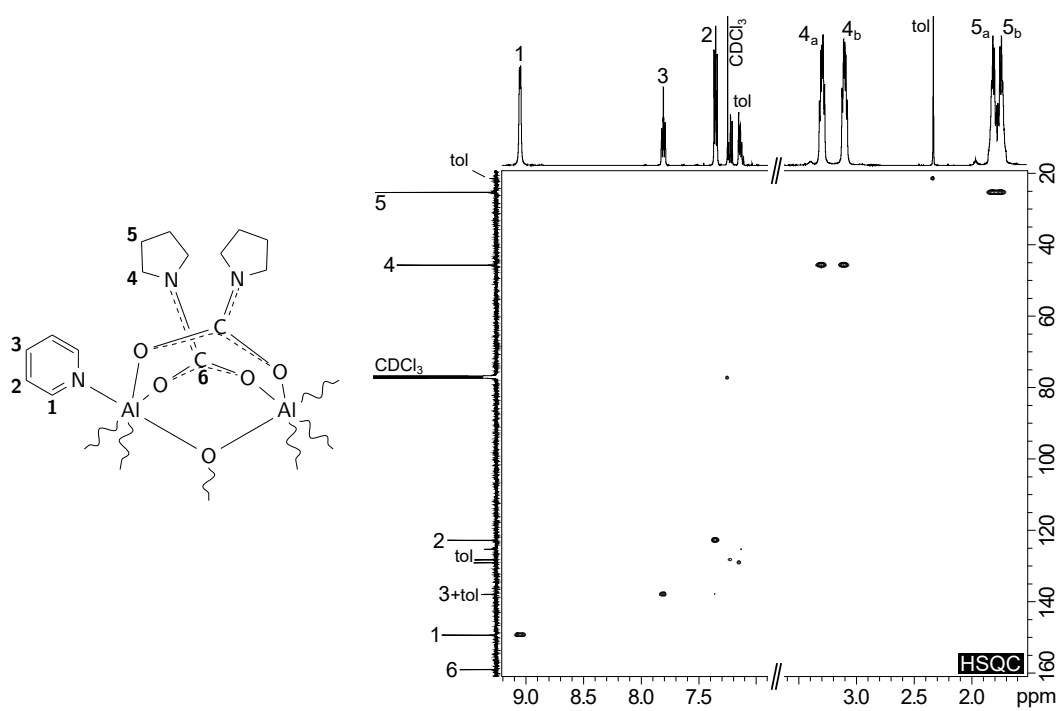

Figure ESI.18: HSQC spectrum ( $\text{CDCl}_3$ ) of compound (1b).

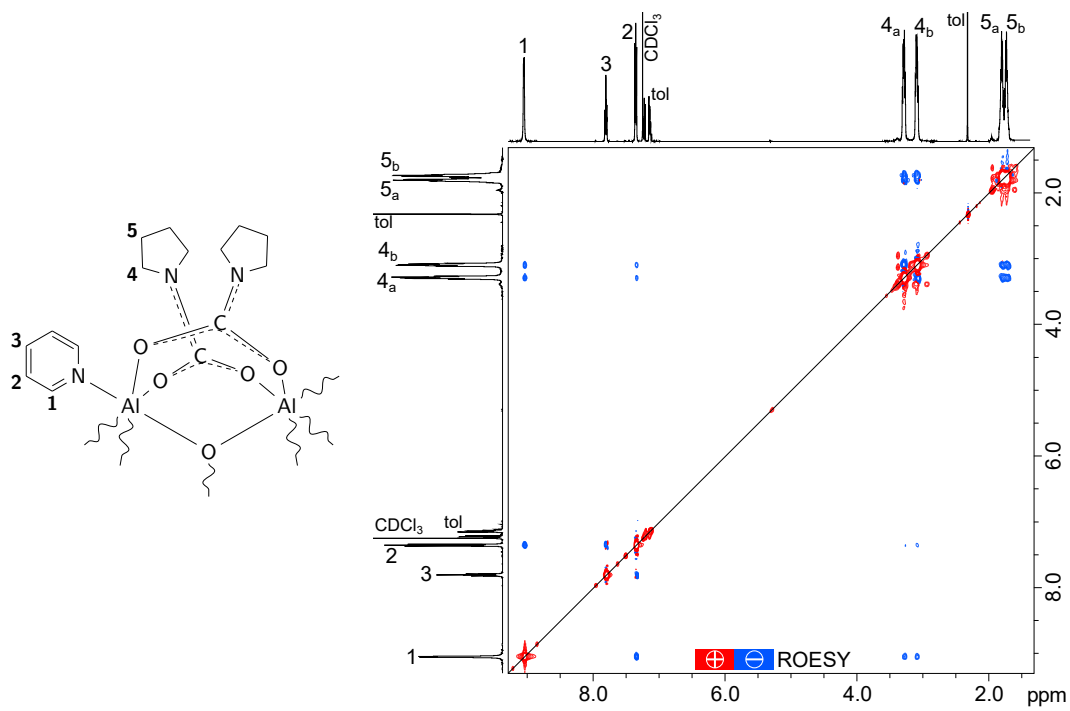

Figure ESI.19:  $\text{H}_2\text{H}$  ROESY spectrum ( $\text{CDCl}_3$ ) of compound (1b); red coloured positive intensity; blue coloured negative intensity.

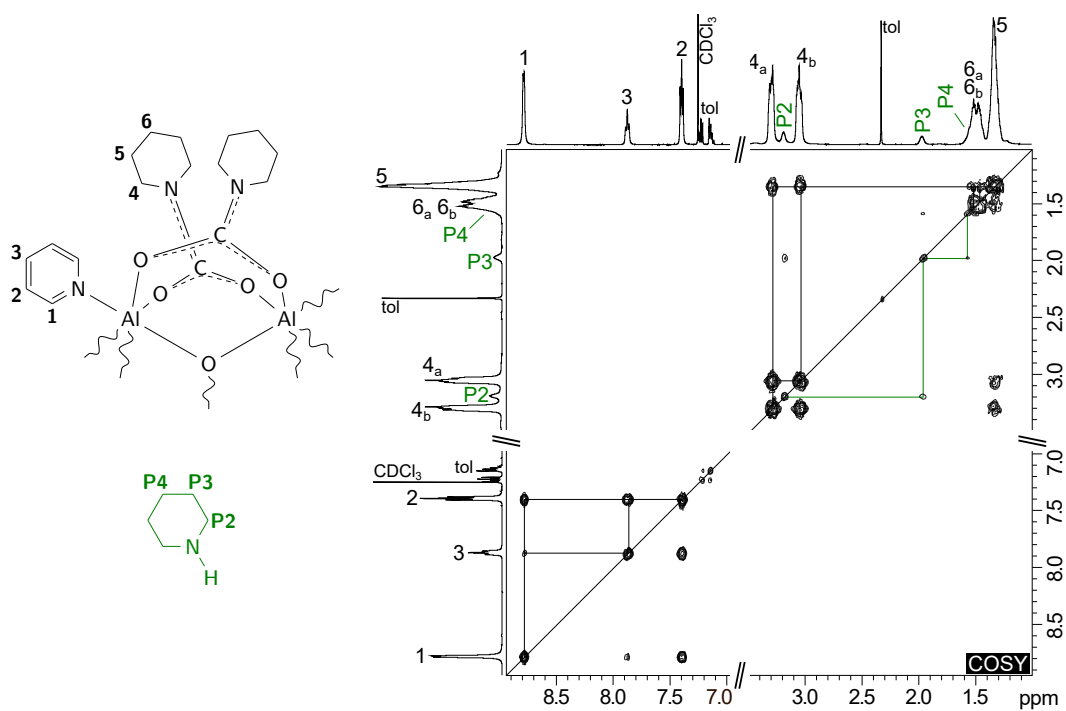

Figure ESI.20: H,H COSY spectrum ( $\text{CDCl}_3$ ) of compound **(2b)** containing residual piperidine (green marked labels P2, P3 and P4);

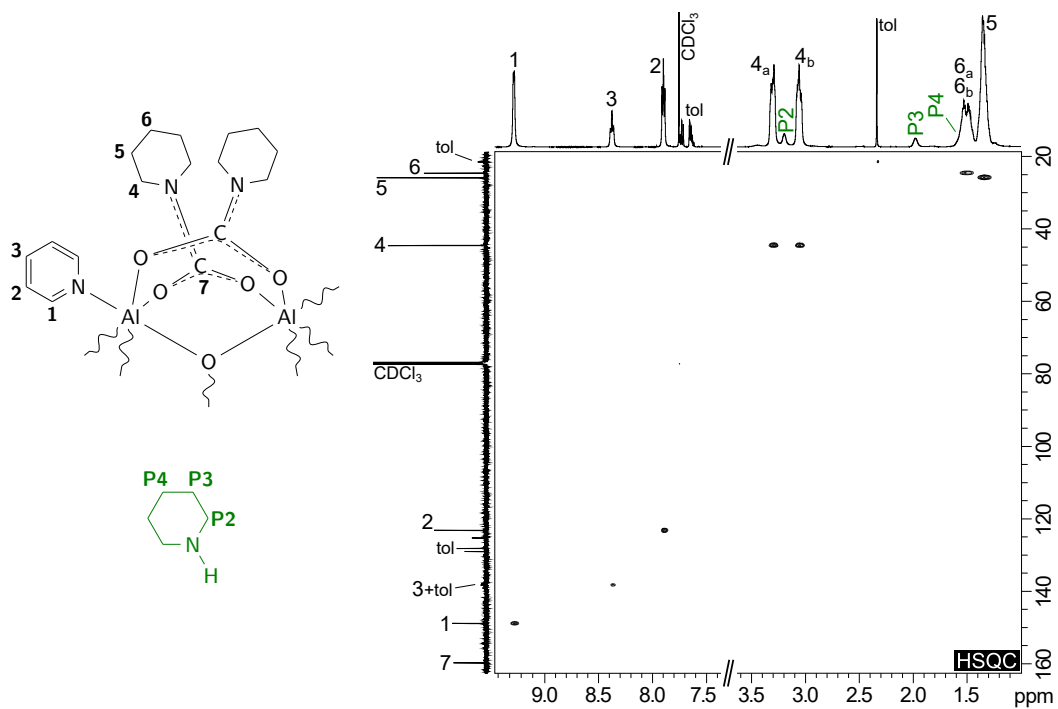

Figure ESI.21: HSQC spectrum ( $\text{CDCl}_3$ ) of compound **(2b)** containing residual piperidine (green marked labels P2, P3 and P4); red coloured positive intensity; blue coloured negative intensity.

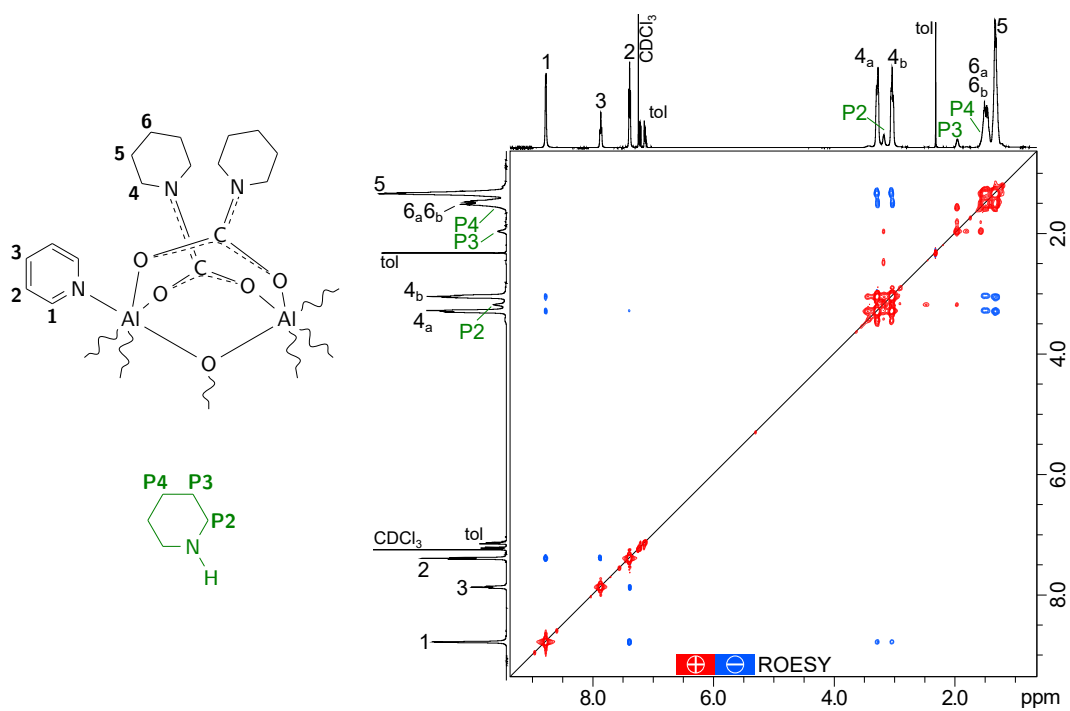

Figure ESI.22: <sup>1</sup>H,<sup>1</sup>H ROESY spectrum (CDCl<sub>3</sub>) of compound (2b) containing residual piperidine (green marked labels P2, P3 and P4); red coloured positive intensity; blue coloured negative intensity.
